# Supplementary material for: Identification of SERPINE1 as a Regulator of Glioblastoma Cell Dispersal with Transcriptome Profiling
Source: Cancers (Basel). 2019 Oct 25;11(11):1651. doi: 10.3390/cancers11111651 (PMC6896086; doi:10.3390/cancers11111651)

## Supplementary Materials

# Identification of *SERPINE1* as a Regulator of Glioblastoma Cell Dispersal with Transcriptome Profiling

Fidan Seker, Ahmet Cingoz, İlknur Sur-Erdem, Nazli Erguder, Alp Erkent, Fırat Uyulur, Myvizhi Esai Selvan, Zeynep Hülya Gümüş, Mehmet Gönen, Halil Bayraktar, Hiroaki Wakimoto and Tugba Bagci-Onder

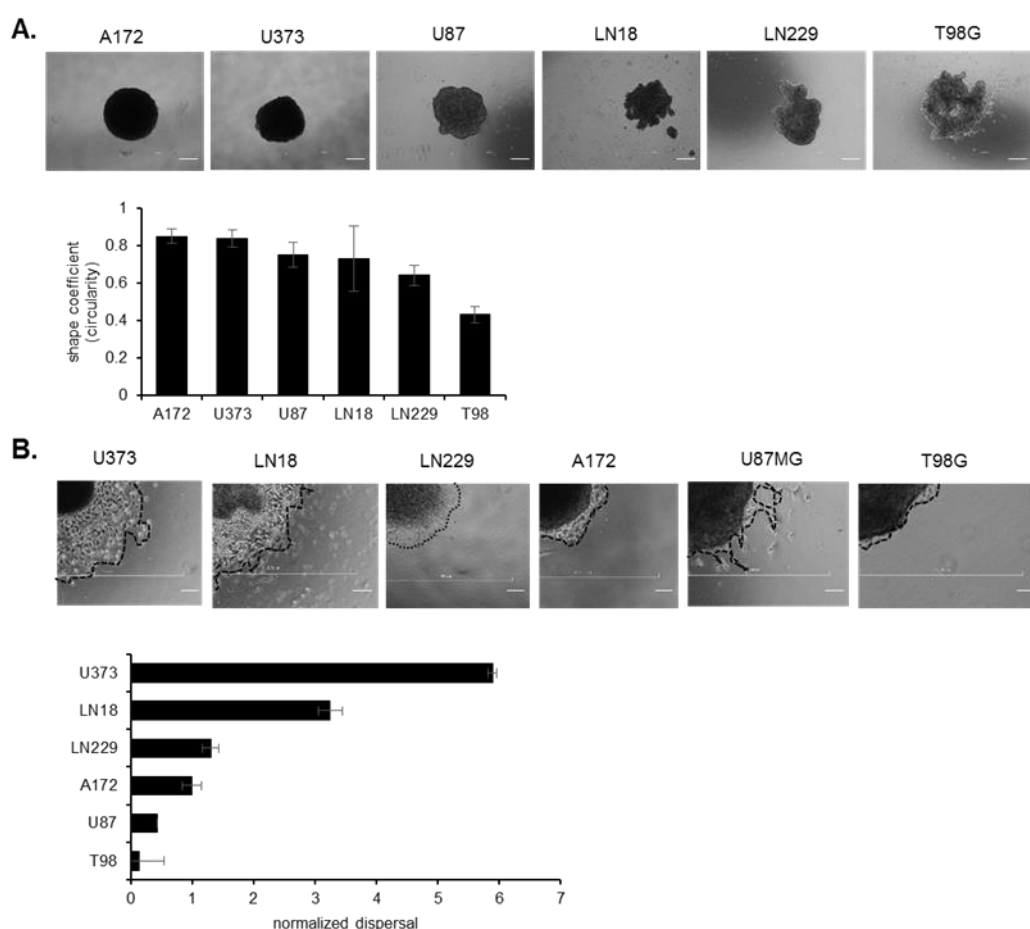

**Figure S1.** U373 cell line-derived spheroids are more dispersive than other GBM cell lines tested. **(A)** Spheroids of 6 GBM cell lines analyzed for their circularity shape coefficient. Shape coefficient value of 1 indicates perfect spheroids. A172, U373 and U87MG can generate almost perfect spheres ( $n = 8$  spheroids for each cell line, scale bar: 250  $\mu\text{m}$ ). **(B)** Dispersal capacity analysis for spheroids at 24 hours of dispersal ( $n = 8$  spheroids for each cell line, scale bar: 250  $\mu\text{m}$ ).

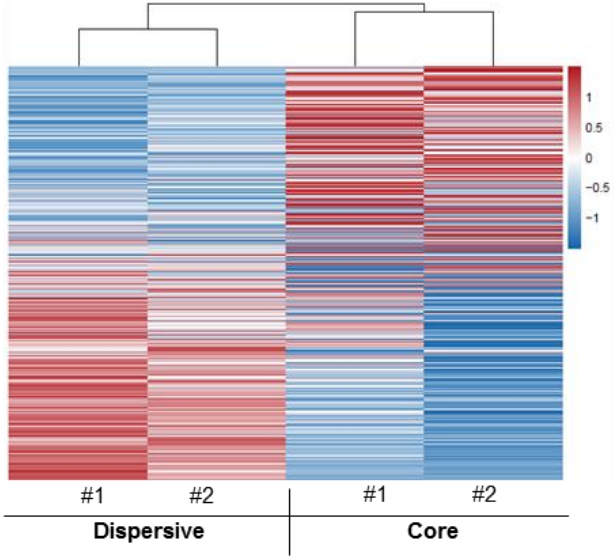

**Figure S2.** Transcriptome of core and dispersive cells have major differences.

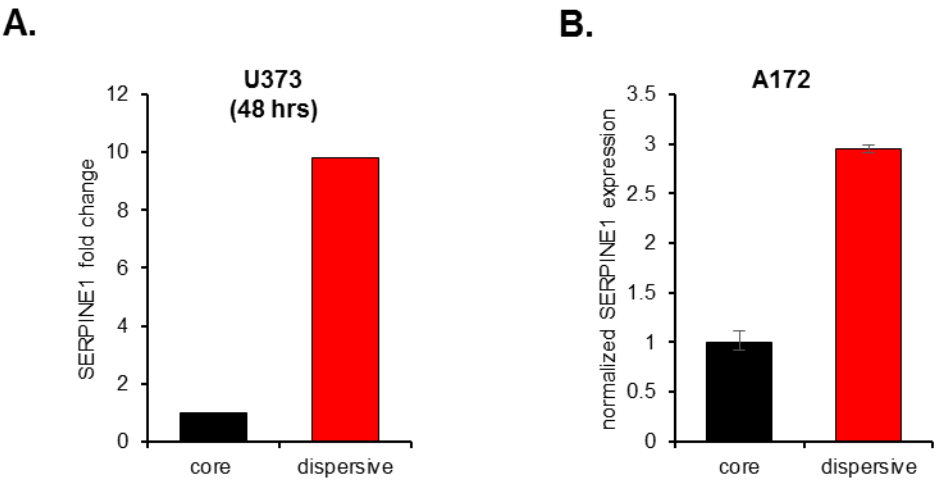

**Figure S3.** *SERPINE1* is upregulated in dispersive cells. (A) *SERPINE1* expression in core and dispersive cells at 48 hours. (B) *SERPINE1* expression in core and dispersive A172 cells.

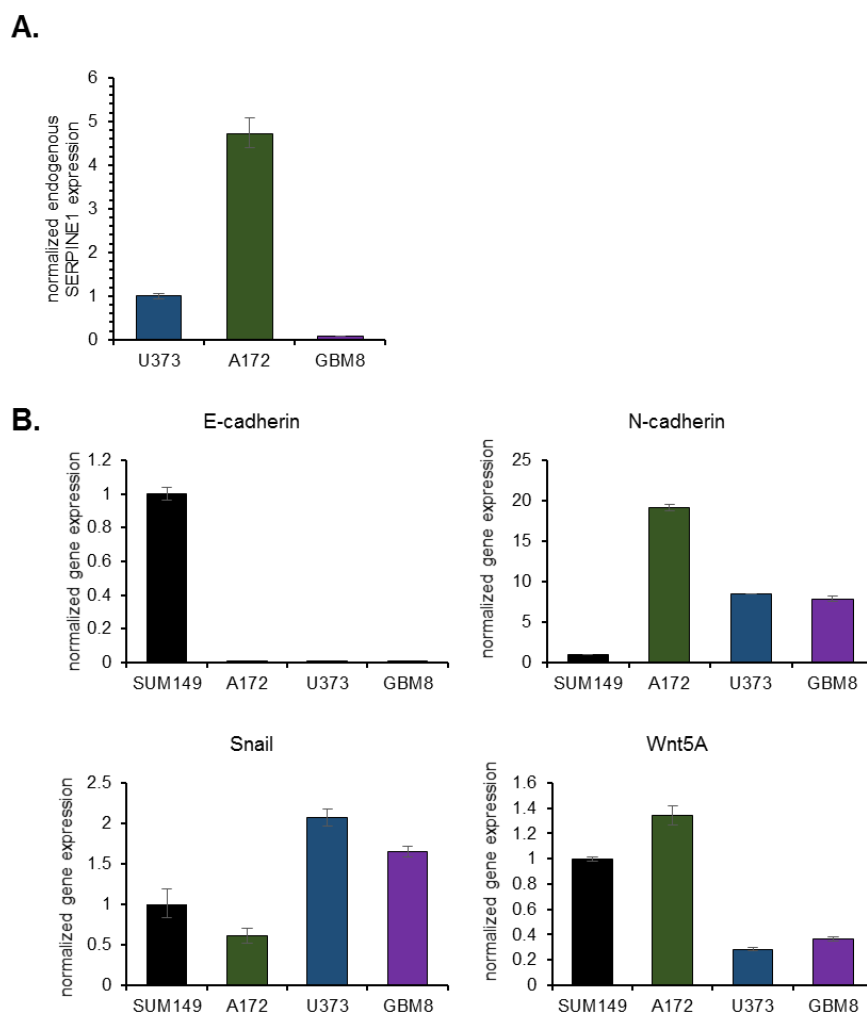

**Figure S4.** Endogenous expression levels of selected EMT genes among cell lines. **(A)** Endogenous *SERPINE1* expression for U373, A172 and GBM8 cells. **(B)** Endogenous expression of selected EMT genes for epithelial cancer cell line SUM149 and GBM cells A172, U373 and GBM8.

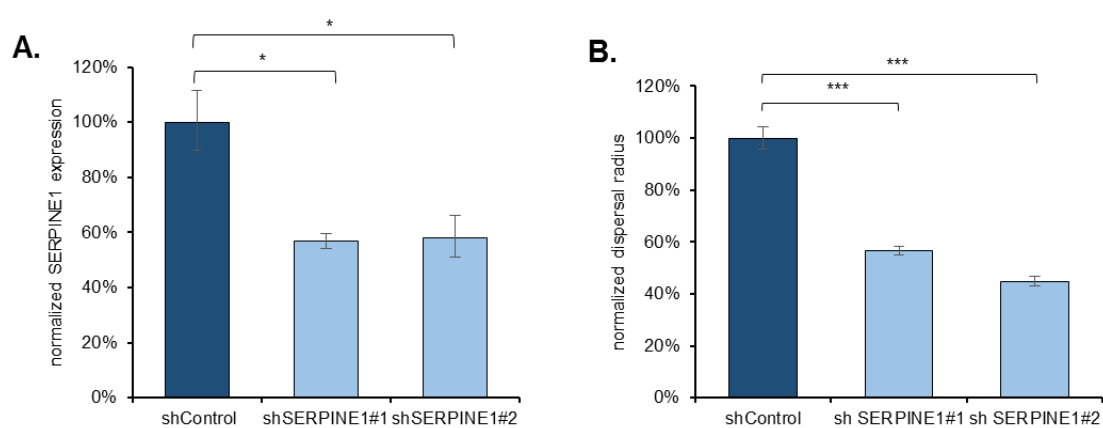

**Figure S5.** Effect of *SERPINE1* knock-down with two different shRNAs on dispersal. **(A)** mRNA levels of *SERPINE1* with 2 different shRNAs. **(B)** Reduced dispersal with *SERPINE1* knock-down ( $n = 24$  spheroids for each condition). (\* and \*\*\* denote  $p < 0.05$  and  $p < 0.001$  respectively, two-tailed Student's  $t$ -test).

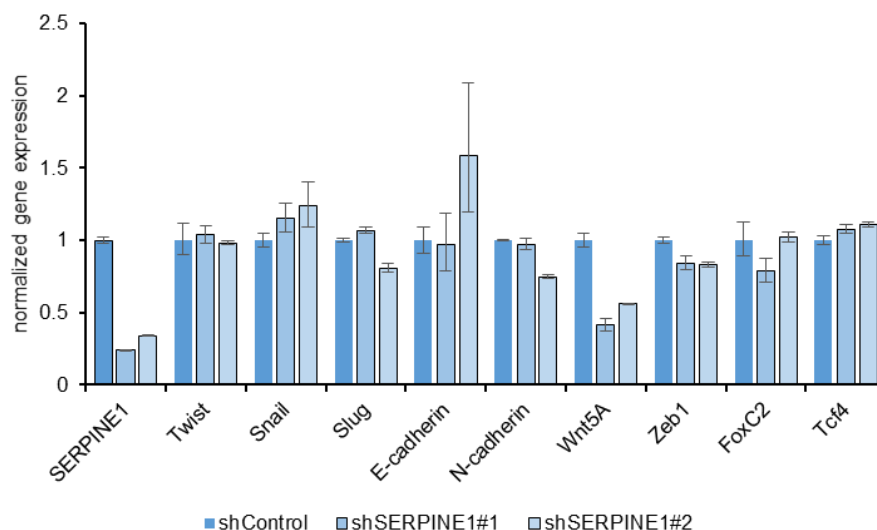

**Figure S6.** *SERPINE1* knock-down does not dramatically affect the expression levels of EMT genes.

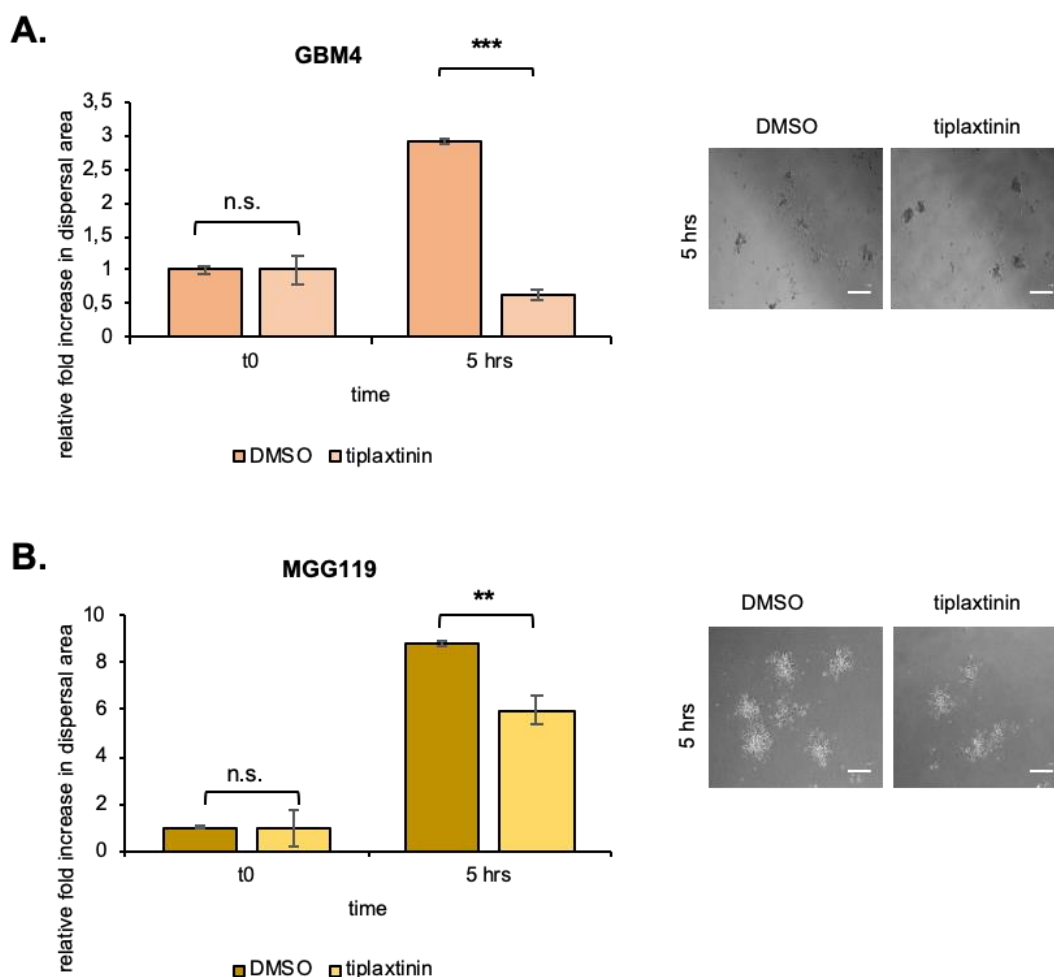

**Figure S7.** *SERPINE1* inhibitor tiplaxtinin reduces dispersal of additional primary GBM cell lines. (A) Tiplaxtinin reduces dispersal of GBM4 spheroids ( $n = 140$  spheroids analyzed per condition, scale bar:  $140\ \mu\text{m}$ ). (B) Tiplaxtinin reduces dispersal of MGG119 spheroids ( $n = 55$  spheroids analyzed per condition, scale bar:  $140\ \mu\text{m}$ ). (\*\* and \*\*\* denote  $p < 0.01$  and  $p < 0.001$  respectively, two-tailed Student's  $t$ -test).

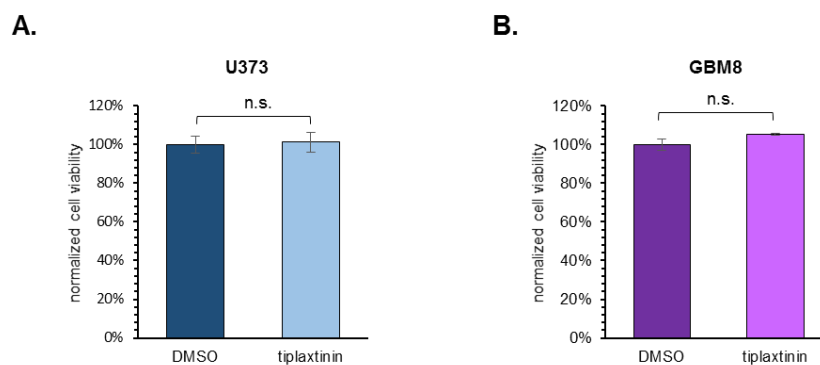

**Figure S8.** Tiplaxtinin does not affect the cell viability of U373 and GBM8 cells. **(A)** Effect of tiplaxtinin on cell viability for U373 cells (Tiplaxtinin: 300  $\mu$ M). **(B)** Effect of tiplaxtinin on cell viability for GBM8 cells Tiplaxtinin: 25  $\mu$ M).

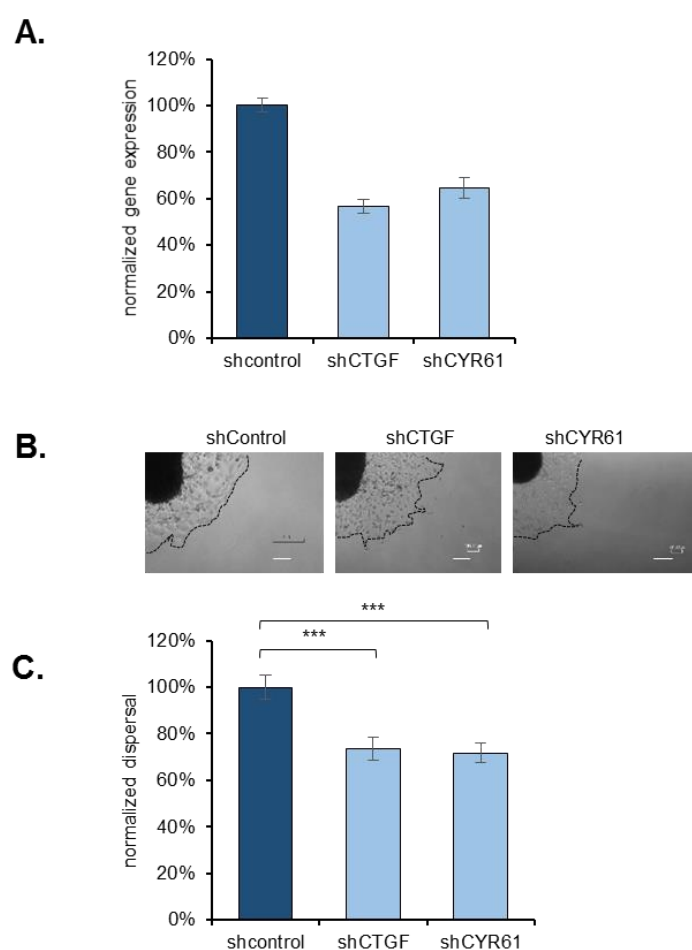

**Figure S9.** *CTGF* or *CYR61* knock-down reduces the dispersal of U373 spheroids. **(A)** mRNA levels after shRNA knock-down of *CTGF* or *CYR61* genes. **(B,C)** Knock-down of *CTGF* or *CYR61* genes reduces dispersal of U373 spheroids significantly ( $n = 24$  spheroids for each condition, scale bar: 200  $\mu$ m). (\*\*\*) denotes  $p < 0.001$ , two-tailed Student's  $t$ -test).

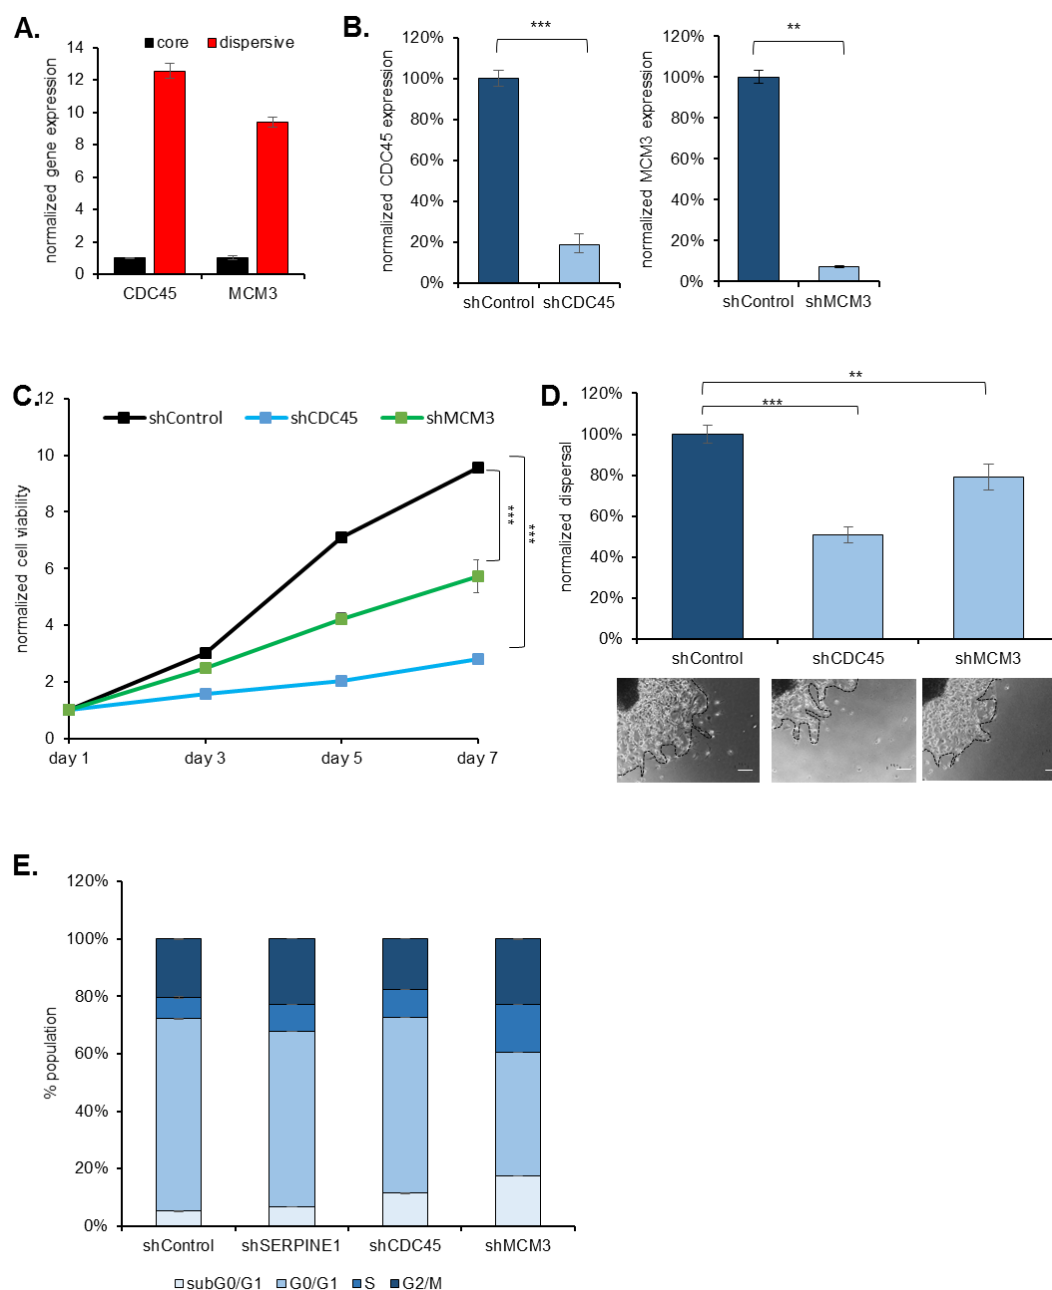

**Figure S10.** Knock-down of *CDC45* or *MCM3* reduces U373 cell viability and spheroid dispersal (**A**) Expression of *CDC45* and *MCM3* genes in core and dispersive cells. (**B**) mRNA levels after shRNA knock-down. **C.** Knock-down of *CDC45* or *MCM3* genes reduces viability of U373 cells. (**D**) Knock-down of *CDC45* or *MCM3* genes reduces dispersal of U373 spheroids significantly ( $n = 24$  spheroids for each condition, scale bar: 200  $\mu\text{m}$ ). (**E**) Cell cycle PI flow analysis for *CDC45*, *MCM3* and *SERPINE1* knock-down. (\*\* and \*\*\* denote  $p < 0.01$  and  $p < 0.001$  respectively, two-tailed Student's  $t$ -test).

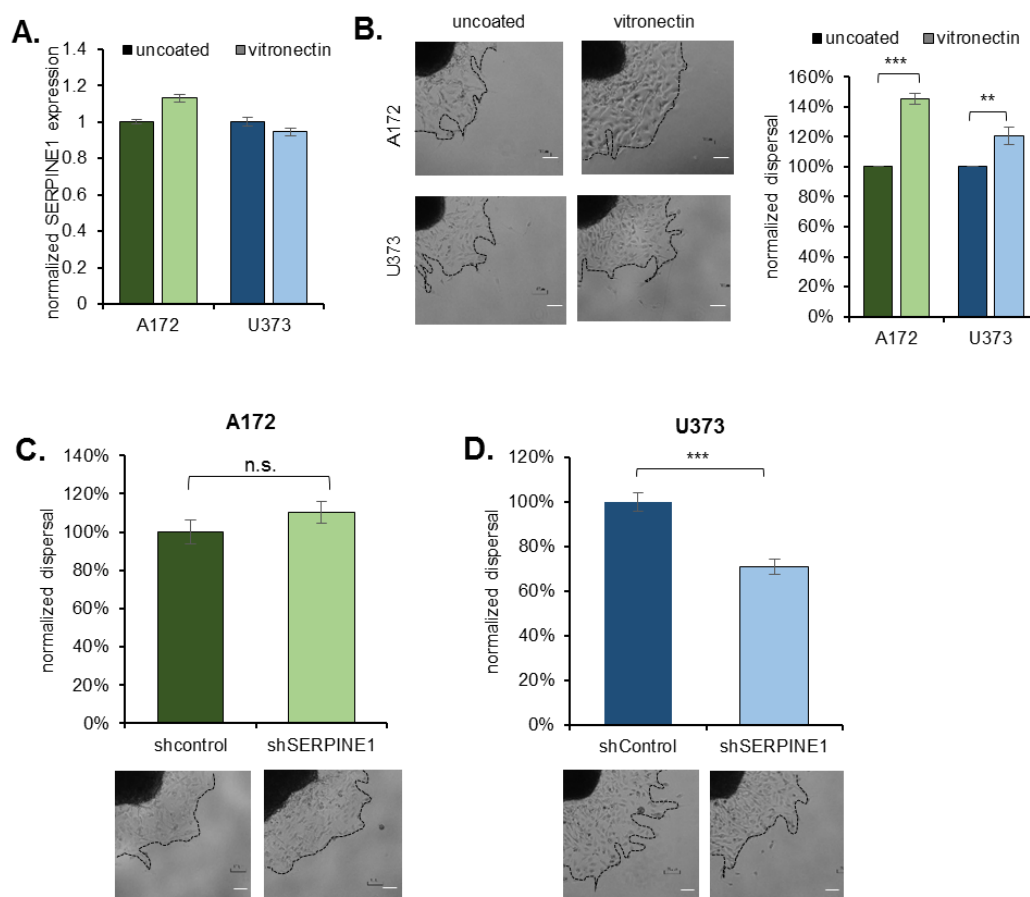

**Figure S11.** Vitronectin increases dispersal without changing *SERPINE1* expression. (A) Comparison of *SERPINE1* expression on no coating and vitronectin coating for A172 and U373 cells. (B) Dispersal analysis of A172 and U373 spheroids on no coating and vitronectin coating ( $n = 24$  spheroids for each condition, scale bar: 200  $\mu\text{m}$ ). (C) *SERPINE1* knockdown does not change dispersal of A172 spheroids on vitronectin ( $n = 24$  spheroids for each condition, scale bar: 200  $\mu\text{m}$ ). (D) *SERPINE1* knockdown reduces dispersal of U373 spheroids also on vitronectin ( $n = 24$  spheroids for each condition, scale bar: 200  $\mu\text{m}$ ). (\*\* and \*\*\* denote  $p < 0.01$  and  $p < 0.001$  respectively, two-tailed Student's  $t$ -test).

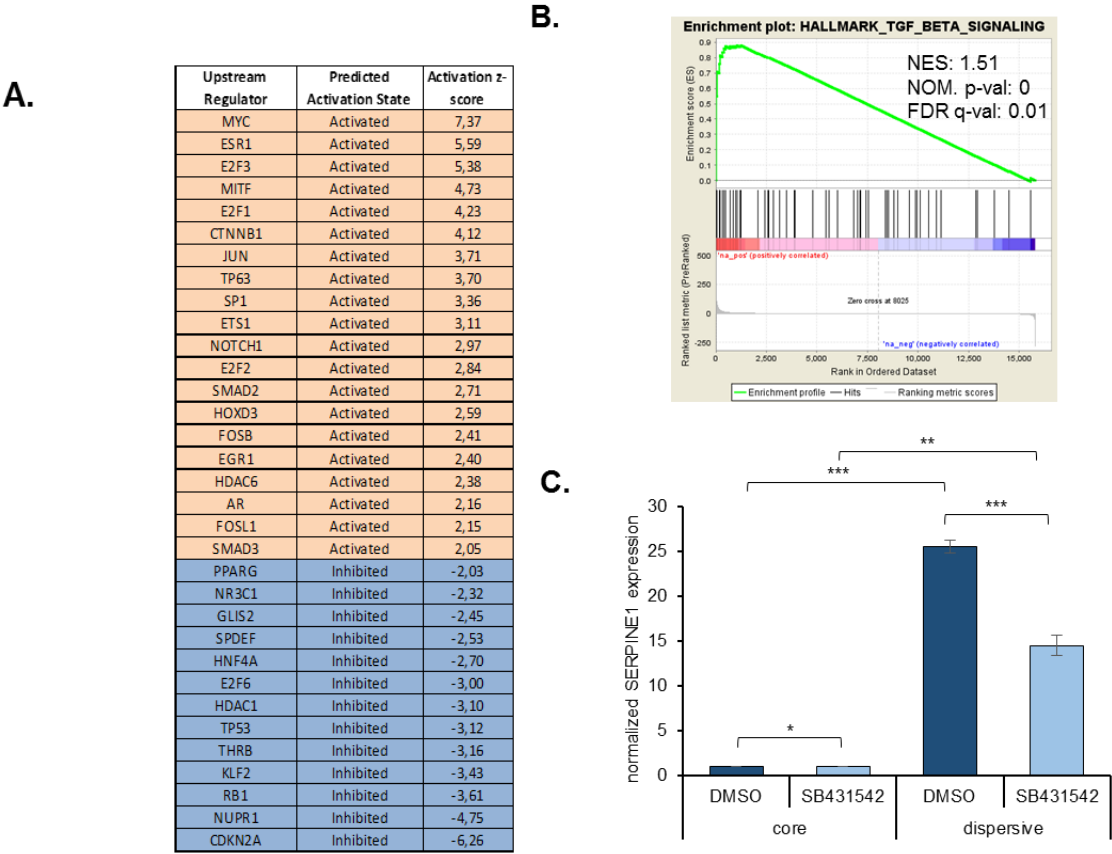

**Figure S12.** TGF $\beta$  is an upstream regulator of U373 dispersal. **(A)** List of upstream regulators activated or inhibited in dispersive cells. **(B)** GSEA enrichment plot for TGF $\beta$  signaling in dispersive cells. **(C)** *SERPINE1* induction in dispersive cells reduces in the presence of TGF $\beta$  inhibitor SB431542. (\*, \*\* and \*\*\* denote  $p < 0.05$ ,  $p < 0.01$  and  $p < 0.001$  respectively, two-tailed Student's  $t$ -test).

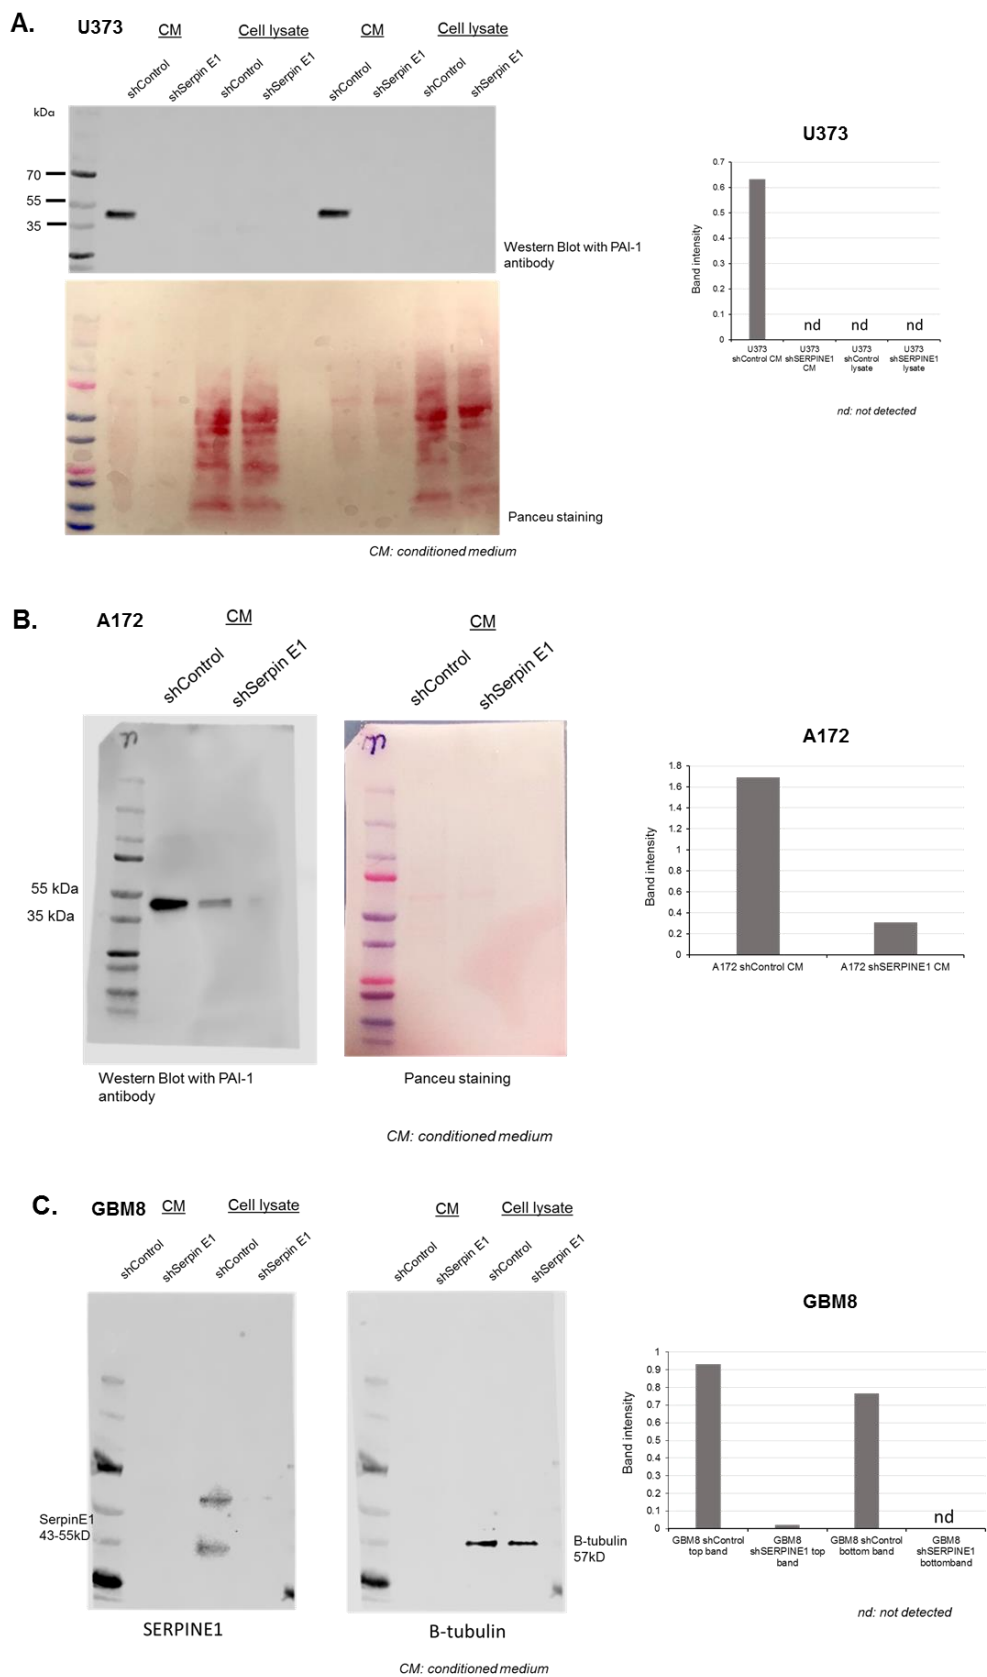

**Figure S13.** Original western blot images and densitometry analysis for western blot experiments. (A) U373 SERPINE1 western blot analysis. (B) A172 SERPINE1 western blot analysis. C. GBM8 SERPINE1 western blot analysis.

**Table S1.** Q-RT primer sequences.

| Gene Name       | Forward Primer (5'-3')    | Reverse Primer (5'-3')    |
|-----------------|---------------------------|---------------------------|
| <i>GAPDH</i>    | AGCCACATCGCTCAGACAC       | GCCCAATACGACCAAATCC       |
| <i>SERPINE1</i> | TCGAGGTGAACGAGAGTGGCA     | AAGGACTGTTCTGTGGGGTTGT    |
| <i>CYR61</i>    | CCAAGAAATCCCCGAACCA       | GAAACGCTGCTTCATTGGCA      |
| <i>CCND1</i>    | AAGATCGTCGCCACCTGGAT      | AGCTCCATTTGCAGCAGCTC      |
| <i>CTGF</i>     | CACCCGGGTTACCAATGACA      | GGATGCACTTTTGGCCTTCTTA    |
| <i>CSF2</i>     | GCTGAGATGAATGAAACAGTAGAAG | CTGGGTGTCACAGGAAGTT       |
| <i>INHBA</i>    | GAAGAGTGGGGACCAGAAAGAGAAT | GCAGCGTCTTCTGGCTGTT       |
| <i>CXCL8</i>    | TTGGCAGCCTTCTGATTTCT      | ATTCTCAGCCCTCTTCAAAAACCTC |
| <i>ANKRD1</i>   | ACGCCAAAGACAGAGAAGGAGAT   | AGATCCATCGGCGTCTTCCCA     |
| <i>NAV3</i>     | CATCCTCCCAAAGATCTTCGCATCA | TCAGCTCACTTCTCTAGAGTTCAC  |
| <i>RAD51</i>    | TGCGGACCGAGTAATGGCA       | TCCTTCTTTGGCGCATAGGCA     |
| <i>HAP1</i>     | AGCTGGCTTCGGAGAAGGAAA     | AAATCATACCTTAGGCTGGATGTGT |
| <i>EFNA1</i>    | AGTTCCAGCGCTTCACACCTT     | TGGGTCATCTGCTGCAAGTCTCT   |
| <i>YPEL4</i>    | GGAGCAGACCTCAAGGTGACTT    | TGAAGCAGCGGAGCAGGTTG      |
| <i>BMF</i>      | GAGCCATCTCAGTGTGTGGAG     | GCCAGCATTGCCATAAAAGAGTC   |
| <i>RGS16</i>    | TCAGAGCTGGGCTGCGATACT     | TTCAGGAAAGCGTGGAAGGCA     |
| <i>PTP4A3</i>   | CCGGTGGAGGTGAGCTACAA      | GCCAGTCCACAACGGTGAT       |
| <i>PCK1</i>     | GACACAGTGCCCATCCCCAAA     | CGTCAGCTCGATGCCGATCTT     |
| <i>PTX3</i>     | CAGACGCGAGCCGACCTG        | TGGTCTCACTGGATGCACGCT     |
| <i>NTM</i>      | TGGTACAAGGATGACAAAAGACTGA | GGGGTCAGGGCTGTAGTTTCA     |
| <i>CDC45</i>    | TGACAGTGATGGGTCAGAGCCT    | GTTCACTCCCAGAGCCACTCC     |
| <i>MCM3</i>     | AGGTAGTTCTTTGGCAGCGG      | AAATCCCTGGTCTTCTCTCGT     |

**Table S2.** shRNA sequences.

| shRNA         | Oligo Sequence (5'-3')                                                                                 |
|---------------|--------------------------------------------------------------------------------------------------------|
| shSERPINE1 #1 | TGCTGTTGACAGTGAGCGAGGACACCCTCAGCATGTTTCATTAGTGAAGCCACA<br>GATGTAATGAACATGCTGAGGGTGTCCCTGCCTACTGCCTCGGA |
| shSERPINE1 #2 | TGCTGTTGACAGTGAGCGCCCATACAATTTTCATCCTCCTTTAGTGAAGCCACA<br>GATGTAAAGGAGGATGAAATTGTATGGTTGCCTACTGCCTCGGA |
| shCDC45       | TGCTGTTGACAGTGAGCGACCAGTCAATGTCGTCAATGTATAGTGAAGCCACA<br>GATGTATACATTGACGACATTGACTGGCTGCCTACTGCCTCGGA  |
| shMCM3        | TGCTGTTGACAGTGAGCGACCACAGATGATCCCACTTTATAGTGAAGCCACA<br>GATGTATAAAGTTGGGATCATCTGTGGCTGCCTACTGCCTCGGA   |
| shCTGF        | TGCTGTTGACAGTGAGCGCCGCTCCTGCAGGCTAGAGAATAGTGAAGCCAC<br>AGATGTATTCTCTAGCCTGCAGGAGGCGTTGCCTACTGCCTCGGA   |
| shCYR61       | TGCTGTTGACAGTGAGCGACCTGTGAATATAACTCCAGAATAGTGAAGCCACA<br>GATGTATTCTGGAGTTATATTCACAGGGTGCCTACTGCCTCGGA  |

**Videos S1–S4:** Live-cell imaging experiment videos for control and *SERPINE1* knock-down U373 cells with no coating or on vitronectin coating. Experiment was carried out using Leica DMI8 inverted microscope with 10× air objective in a chamber at 37°C, supplied with 5% CO<sub>2</sub>. Time lapse series were captured from positions for 21 hours 55 mins, images were taken in every 11 minutes.

**Videos S5–S6:** Live-cell imaging experiment videos for control and *SERPINE1* knock-down GBM8 cells. Experiment was carried out using Leica DMI8 inverted microscope with 10X air objective in a chamber at 37 °C, supplied with 5% CO<sub>2</sub>. Time lapse series were captured from positions for 5 hours of dispersal, images were taken in every 5 minutes.

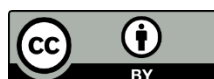

Supplement: Supplementary file 1 [file cancers-11-01651-s001.pdf]
